# Supplementary material
Source: PubMed Central journal article supplement (PMC5129718)
Supplement: supp_pp.16.01281_PP2016-01281R1_Supplemental_Material.pdf [file supp_pp.16.01281_PP2016-01281R1_Supplemental_Material.pdf]

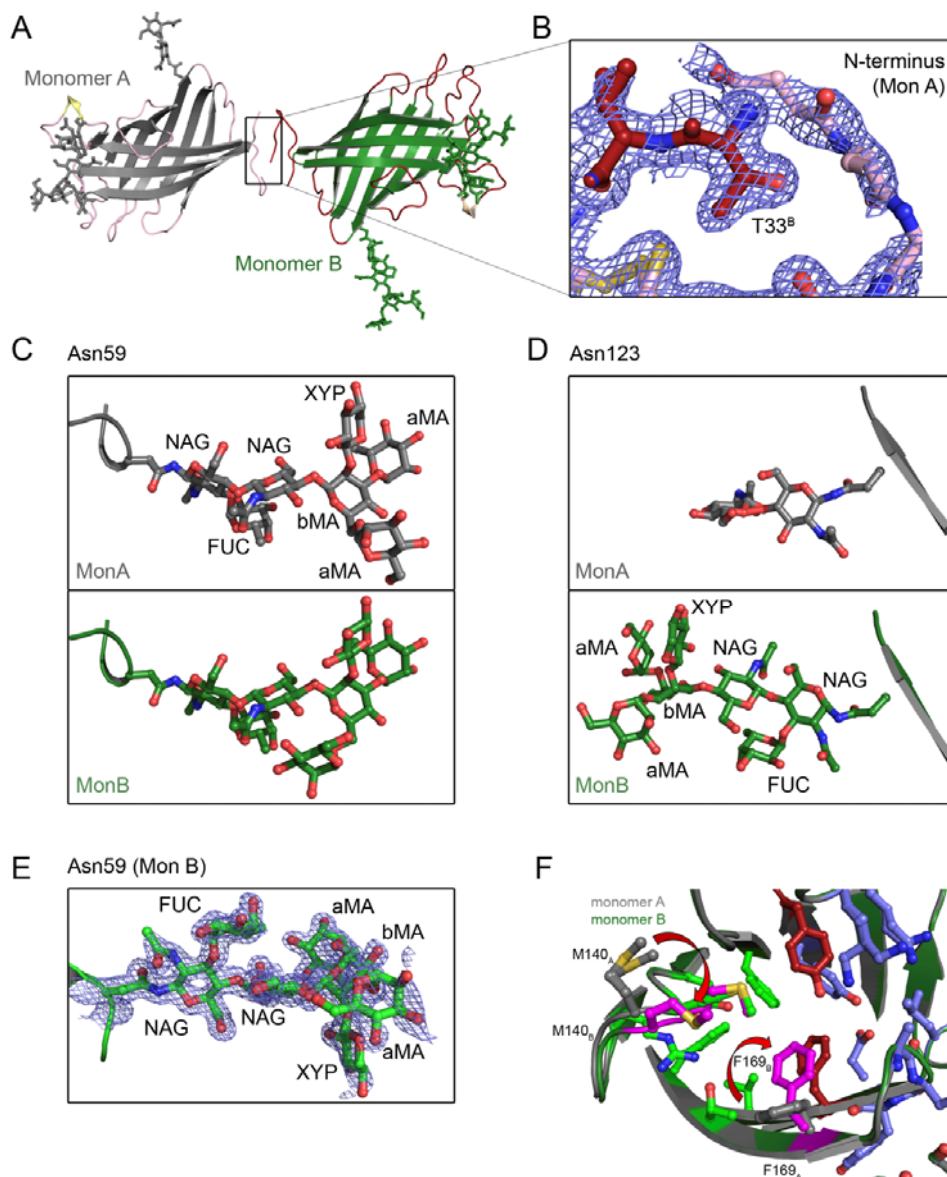

**Supplemental Figure S1.** Structural features of AtDIR6.

A, AtDIR6 dimer of the asymmetric unit showing the joint  $\beta$ -sheet between both monomers. B, Representation of the electron density around C-terminal Thr33 of monomer B. C, Structure of the Asn59 paucimannose moieties. D, Structure of the paucimannose sugars connected to Asn123. E, Structure of the paucimannose moiety at Asn59 of monomer B. NAG: *N*-acetyl-glucosamine, FUC:  $\alpha$ -Fucose, XYP:  $\beta$ -*D*-Xylopyranose,  $\alpha$ MA,  $\alpha$ -*D*-Mannose,  $\beta$ MA,  $\beta$ -*D*-Mannose. Density, refined without the moiety atoms, is shown in blue at  $1\sigma$ . F, Overlay of monomer A (gray) and monomer B (green) showing differences in the active sites. Important monomer B residues that differ from those in monomer A are shown in purple. Red arrows indicate movement of residues.

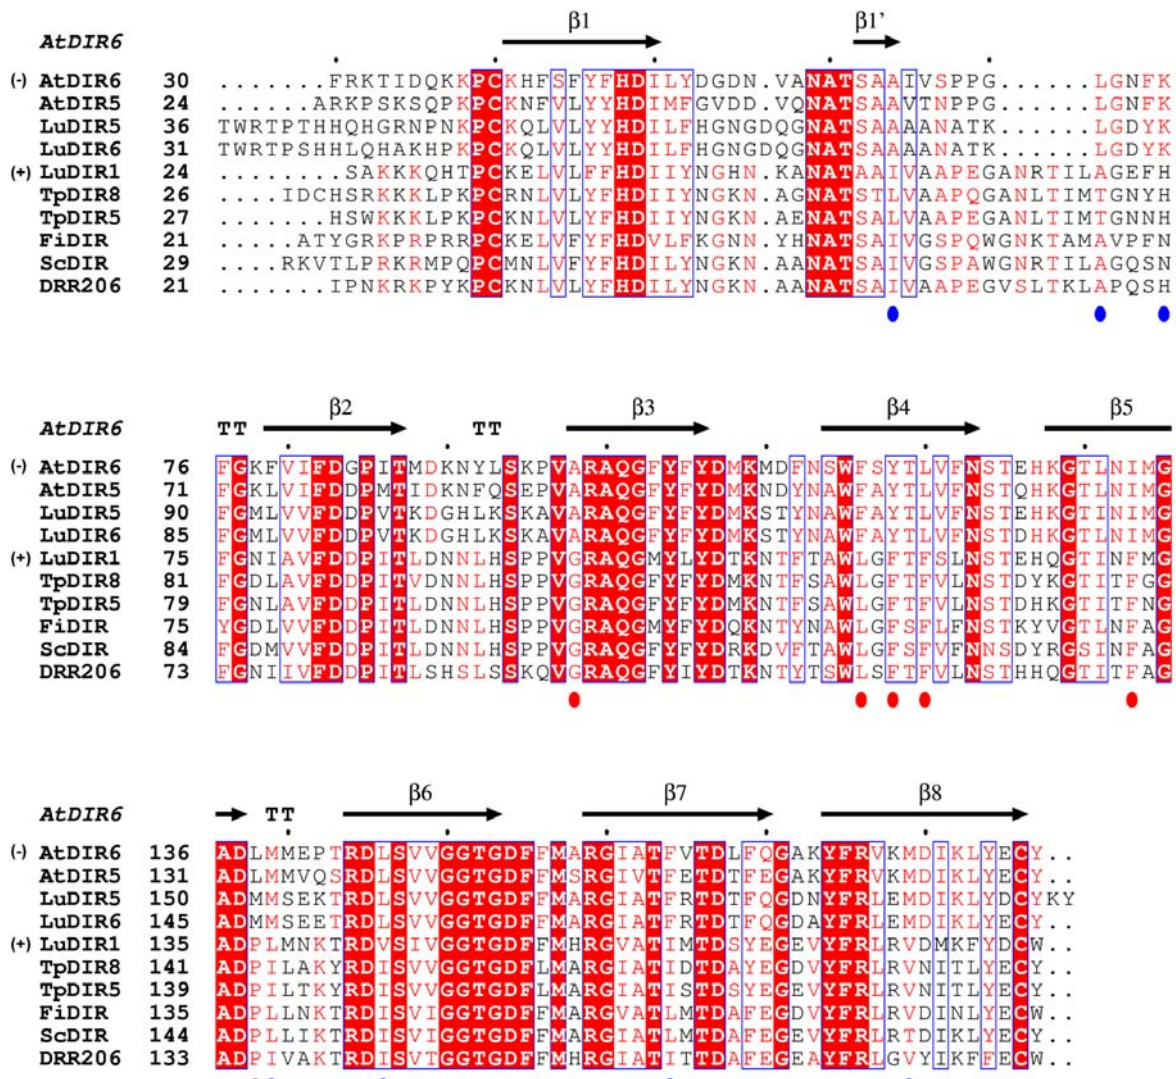

**Supplemental Figure S2.** Sequence of *AtDIR6* aligned with those of other (-)- and (+)-DIRs.

Only full-length sequences are shown. The alignment was generated with ClustalΩ and illustrated using the ESPrpt webserver (esprpt.ibcp.fr/). Strictly conserved residues are boxed in red. Those that are conserved in (+)- and (-)-DIRs are highlighted by purple and blue dots, respectively. Red dots indicate residues that are differentially conserved in (+)- and (-)-DIRs. Secondary structure elements of *AtDIR6* are shown above the alignment.

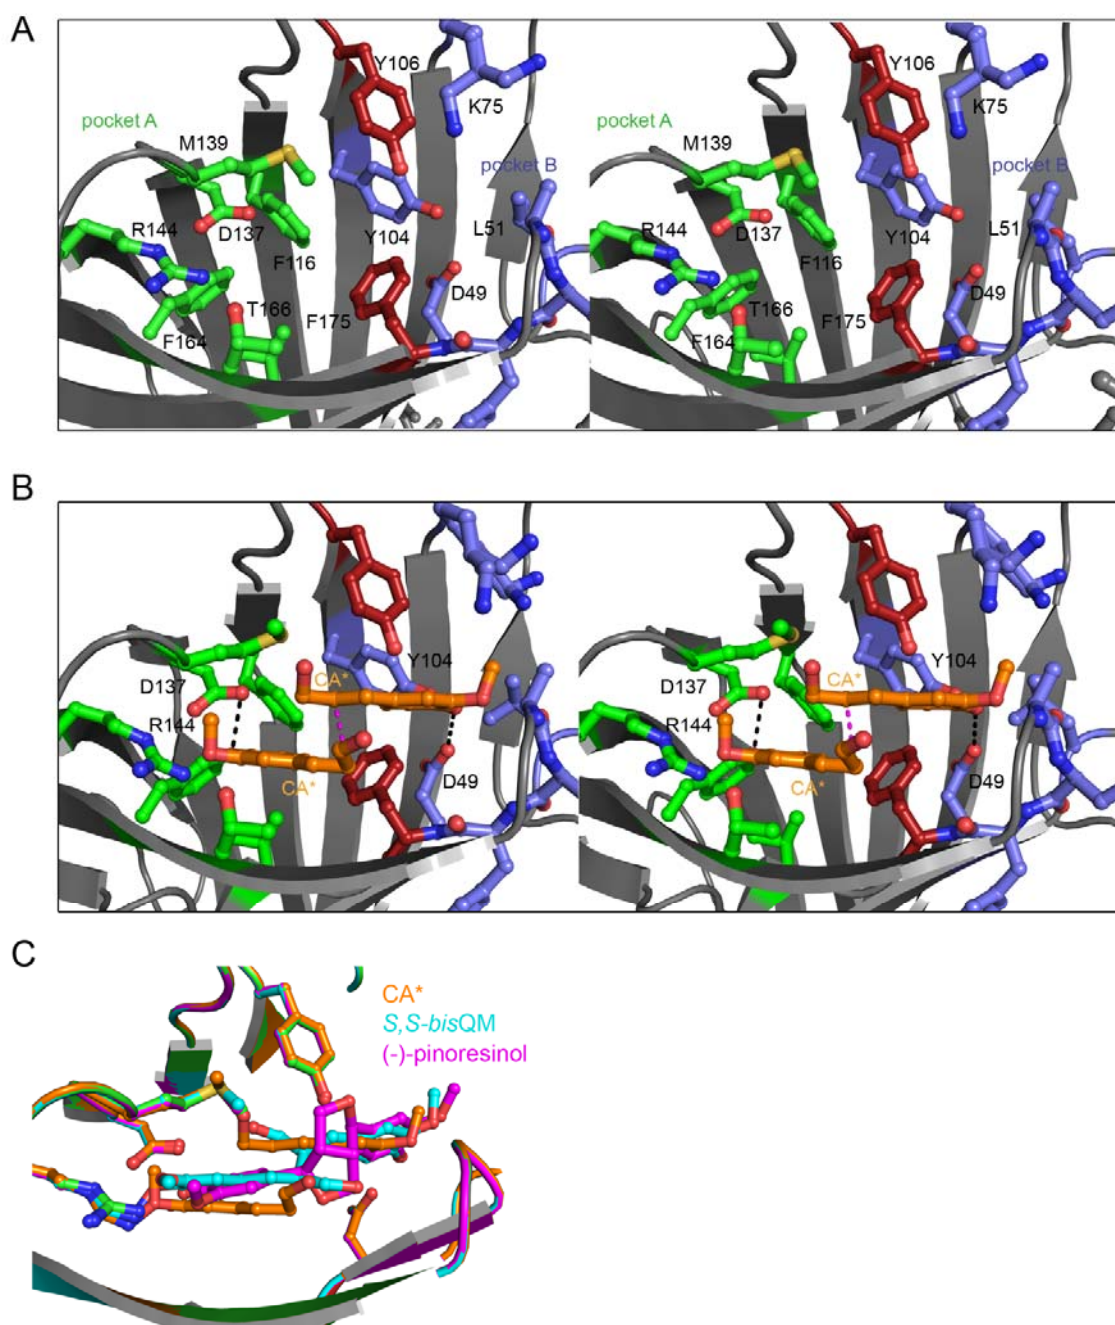

**Supplemental Figure S3.** Stereo view of Fig. 3 panels *C* and *D*.

A, Stereo view of the active site showing important residues of pocket A in green, pocket B in blue, and Tyr106 and Phe175 separating the two pockets in red. D, Stereo view of the potential binding mode of two CA<sup>•</sup> substrate radicals supported by energy minimization of the manually placed ligands; color code as in (A).

A AtDIR6

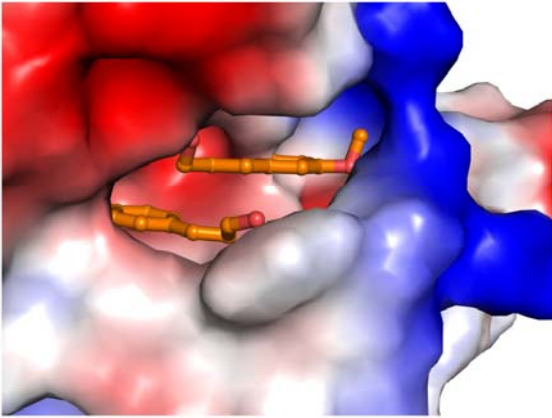

B PsDRR206

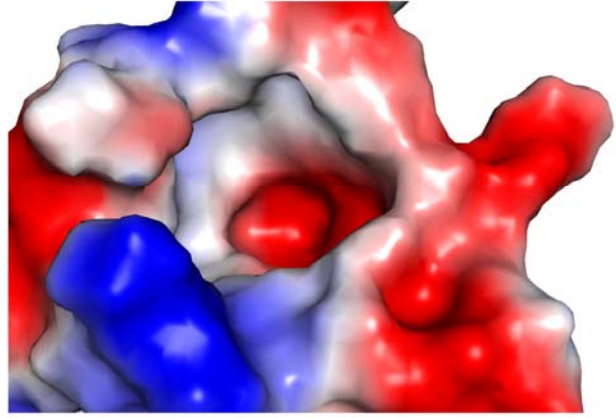

**Supplemental Figure S4.** Surface representations of AtDIR6 and DRR206 binding cavities.

A, Surface representation of AtDIR6 showing the two manually modelled substrate molecules in the two-lobed binding cavity. B, Surface representation of PsDRR206 with view onto the opening of the active site. Red: negative surface charge, blue: positive.

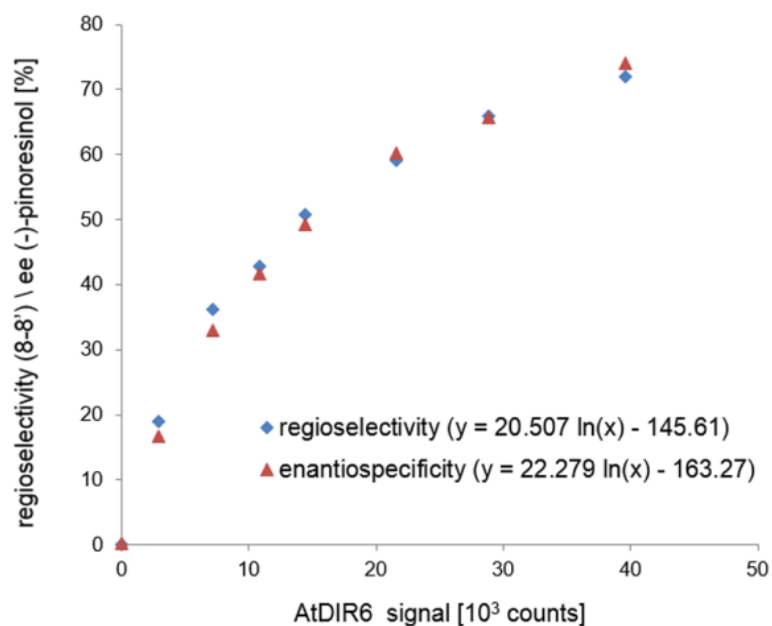

**Supplemental Figure S5.** Regio- and enantio-selectivity are tightly linked.

Regioselectivity was analyzed by RP-HPLC as relative increase in pinoresinol formation in presence of AtDIR6 as compared to the undirected control (blue diamonds). Enantioselectivity was analyzed by chiral HPLC and is expressed as enantiomeric excess of (-)- over (+)-pinoresinol (red triangles). Regio- and enantioselectivity show the same increase with increasing amounts of AtDIR6 in the assay. AtDIR6 was quantified by western blot analysis as detailed in the Materials and Methods section.

**Table S1.** Primers for site-directed mutagenesis. Primer sequences are given in 5' to 3' orientation. Mutated codons are highlighted in bold face and underlined. All primers were obtained from Eurofins Genomics (Ebersberg, Germany).

| mutant | target sequence                                         | forward primer                                        | reverse primer                                             |
|--------|---------------------------------------------------------|-------------------------------------------------------|------------------------------------------------------------|
| F47A   | CACTTCTCGTTCTAT <u>TTCC</u> AT<br>GACATCCTCTACGATGG     | CACTTCTCGTTCTAT <u>GCC</u> CATG<br>ACATCCTCTACGATGG   | CCATCGTAGAGGATGTCATGG <u>G</u><br><u>C</u> ATAGAACGAGAAGTG |
| D49A   | CTCGTTCTATTTCCAT <u>GAC</u> AT<br>CCTCTACGATGG          | CTCGTTCTATTTCCAT <u>GCC</u> ATCC<br>TCTACGATGG        | CCATCGTAGAGGAT <u>GGC</u> ATGGA<br>AATAGAACGAG             |
| D49N   | CTCGTTCTATTTCCAT <u>GAC</u> AT<br>CCTCTACGATGG          | CTCGTTCTATTTCCAT <u>AAC</u> ATC<br>CTCTACGATGG        | CCATCGTAGAGGAT <u>GTT</u> ATGGA<br>AATAGAACGAG             |
| K75N   | GGACTAGGAAACTT <u>CAAG</u> TT<br>CGGTAAGTTTG            | GGACTAGGAAACTT <u>CAAT</u> TTC<br>GGTAAGTTTG          | CAAACCTACCGA <u>AAT</u> TGAAGTT<br>TCCTAGTCC               |
| F82A   | GGTAAGTTTGTGATC <u>TTT</u> GAT<br>GGGCCATAACAATGG       | GGTAAGTTTGTGATC <u>GCT</u> GAT<br>GGGCCATAACAATGG     | CCATTGTTATGGGCCATC <u>AGC</u><br>GATCACAACTTACC            |
| Y104F  | CGCACAAGGCTTCTAT <u>TTT</u> CTA<br>TGAC                 | CGCACAAGGCTTCT <u>TTTT</u> CTAT<br>GAC                | GTCATAGAA <u>AAA</u> GAAAGCCTTGT<br>GCG                    |
| Y106F  | GGCTTCTATTTCTA <u>TG</u> ACATG<br>AAGATGG               | GGCTTCTATTTCT <u>TTT</u> GACATGA<br>AGATGG            | CCATCTTCATGTC <u>AAA</u> GAAATA<br>GAAGC                   |
| S114A  | GAAGATGGACTTCAAT <u>T</u> CGT<br>GGTTTTCC               | GAAGATGGACTTCAAT <u>GCG</u> TG<br>GTTTTCC             | GGAAAACCA <u>CGC</u> ATTGAAGTCC<br>ATCTTC                  |
| F116A  | GACTTCAATTCGTGG <u>TTT</u> TCC<br>TACACGTTGG            | GACTTCAATTCGTGG <u>GCT</u> TCCCT<br>ACACGTTGG         | CCAACGTGTAGGA <u>AGC</u> CCACGA<br>ATTGAAGTC               |
| Y118A  | GGACTTCAATTCGTGGTTTTCC<br>CTA <u>CAC</u> GTTGGTGTTAACTC | GGACTTCAATTCGTGGTTTTCC<br><u>GCC</u> ACGTTGGTGTTAACTC | GAGTTAAACACCAACGT <u>GGC</u> GG<br>AAAACCACGAATTGAAGTCC    |
| D137A  | CATAATGGGTGCTGAT <u>T</u> TGA<br>TGATGGAGCC             | CATAATGGGTGCT <u>GCT</u> TTGAT<br>GATGGAGCC           | GGCTCCATCATCAA <u>AGC</u> AGCAC<br>CCATTATG                |
| D137N  | CATAATGGGTGCTGAT <u>T</u> TGA<br>TGATGGAGCC             | CATAATGGGTGCT <u>AAT</u> TTGAT<br>GATGGAGCC           | GGCTCCATCATCAA <u>ATT</u> AGCAC<br>CCATTATG                |
| M139A  | GGGTGCTGATTTGATGATGG<br>AGCCAACAAG                      | GGGTGCTGATTTG <u>GCG</u> ATGGA<br>GCCAACAAG           | CTTGTTGGCTCCAT <u>CGC</u> CAAATC<br>AGCACCC                |

|               |                                                            |                                                            |                                                    |
|---------------|------------------------------------------------------------|------------------------------------------------------------|----------------------------------------------------|
| M140A         | GGGTGCTGATTTGATG <u>GATGG</u><br>AGCCAACAAG                | GGGTGCTGATTTGATG <u>GCGGA</u><br>GCCAACAAG                 | CTTGTTGGCT <u>CGCCATCAAATC</u><br>AGCACCC          |
| R144M         | GGAGCCAACA <u>AAGAGATCTAT</u><br>CGG                       | GGAGCCAACA <u>ATGGATCTATC</u><br>GG                        | CCGATAGATC <u>CATTGTTGGCTC</u><br>C                |
| F164L         | GGCTCGTGGGATCGCTAC <u>CT</u><br><u>TCGTGACTGATTTATTT</u> C | GGCTCGTGGGATCGCTAC <u>CTT</u><br><u>GGTGACTGATTTATTT</u> C | GAAATAAATCAGTCAC <u>CAAGGT</u><br>AGCGATCCCACGAGCC |
| T166V         | CGCTACCTTCGTG <u>ACTGATTT</u><br>ATTTCAAGG                 | CGCTACCTTCGTG <u>GTTGATTTA</u><br>TTTCAAGG                 | CCTTGAAATAAATC <u>AACCACGA</u><br>AGGTAGCG         |
| F169A         | CGTGACTGATTTATTTCAAGG<br>GGCTAAG                           | CGTGACTGATTTA <u>GCTCAAGG</u><br>GGCTAAG                   | CTTAGCCCCTTG <u>AGCTAAATCA</u><br>GTCACG           |
| A172D         | GACTGATTTATTTCAAGGG <u>G</u><br><u>CTAAGTATTTCCGAG</u>     | GACTGATTTATTTCAAGGG <u>GA</u><br><u>TAAGTATTTCCGAG</u>     | CTCGGAAATACTT <u>ATCCCCTTGA</u><br>AATAAATCAGTC    |
| F175W         | GGGGCTAAGTATTT <u>CCGAGT</u><br>TAAGATGG                   | GGGGCTAAGTAT <u>TGGCGAGTT</u><br>AAGATGG                   | CCATCTTAACTCG <u>CCAATACTTA</u><br>GCCCC           |
| V177W         | GTATTTCCGAGTTAAGATGG<br>ATATTAAG                           | GTATTTCCGAT <u>TGGAAGATGGA</u><br>TATTAAGC                 | GCTTAATATCCATCTT <u>CCATCGG</u><br>AAATAC          |
| M179A         | GTATTTCCGAGTTAAG <u>ATGG</u><br>ATATTAAGCTCTATG            | GTATTTCCGAGTTAAG <u>GCGGA</u><br>TATTAAGCTCTATG            | CATAGAGCTTAATATC <u>CGCCTTA</u><br>ACTCGGAAATAC    |
| PLL-<br>motiv | GGGTGCTGATTTGATGATGG<br>AGCCAACAAG                         | GGGTGCTGAT <u>CCGTTGTTGGA</u><br>GCCAACAAG                 | CTTGTTGGCTC <u>CAACAACGGAT</u><br>CAGCACCC         |
